# Supplementary material
Source: PubMed Central journal article supplement (PMC7161741)
Supplement: NIHMS1530250-supplement-1.pdf [file NIHMS1530250-supplement-1.pdf]

## **Supplementary Contents**

- Supplementary Table 1. Adverse Events
- Supplementary Table 2. Drinking and HIV-related outcomes by treatment group
- Supplementary Table 3. Past 6 month treatment services, emergency department visits and hospitalizations at baseline and follow-up by treatment group

**Supplementary Table 1. Adverse Events<sup>a</sup>**

| <b>Adverse Event, n</b>                                             | <b>Integrated Stepped Alcohol Treatment</b> | <b>Treatment as Usual</b> |
|---------------------------------------------------------------------|---------------------------------------------|---------------------------|
| <b>Medically-Related</b>                                            |                                             |                           |
| Cardiovascular (chest pain, congestive heart failure, hypertension) | 1                                           | 5                         |
| Headaches                                                           | 1                                           | 0                         |
| Gastrointestinal symptoms                                           | 1                                           | 3                         |
| End-stage renal disease                                             | 0                                           | 1                         |
| Infection                                                           | 0                                           | 1                         |
| <b>Surgically-Related</b>                                           |                                             |                           |
| Appendectomy                                                        | 0                                           | 1                         |
| <b>Psychiatrically-Related</b>                                      |                                             |                           |
| Suicidality                                                         | 1                                           | 1                         |
| Substance-Related                                                   | 3                                           | 0                         |
| Trauma or injury (car accident, fracture)                           | 1                                           | 2                         |
| Death                                                               | 2                                           | 0                         |

a. Only headaches were considered possibly study related; no other events were considered possibly or likely study related.

**Supplementary Table 2. Drinking and HIV-related outcomes by treatment group**

| Outcome                                               | Integrated Stepped Alcohol Treatment, n=63 | Treatment as Usual, n=65 | Adjusted Treatment Effect (95% CI)<br>ISAT vs. TAU <sup>a,b</sup> | P value <sup>a</sup> |
|-------------------------------------------------------|--------------------------------------------|--------------------------|-------------------------------------------------------------------|----------------------|
| <b>Drinks per week, Lsmean (SD)</b>                   |                                            |                          |                                                                   |                      |
| Baseline                                              | 31.3 (23.5)                                | 32.8 (27.3)              | NA                                                                |                      |
| Week 24                                               | 10.4 (16.5)                                | 15.6 (17.6)              | -4.24 (-9.39, 0.91)                                               | 0.11                 |
| Week 52                                               | 7.8(14.3)                                  | 15.9(18.9)               | -6.86(-15.02,1.28)                                                | 0.10                 |
| <b>No heavy drinking days, n (%)<sup>c</sup></b>      |                                            |                          |                                                                   |                      |
| Baseline                                              | 4/61 (6.56)                                | 7/64 (10.94)             | N/A                                                               |                      |
| Week 24                                               | 26/49 (53.06)                              | 19/49 (38.78)            | 2.21 (0.80, 6.10)                                                 | 0.13                 |
| Week 52                                               | 25/36 (69.44)                              | 14/39 (35.90)            | 4.90 (1.51, 15.84)                                                | 0.008                |
| <b>Drinks per drinking day, Lsmean (SD)</b>           |                                            |                          |                                                                   |                      |
| Baseline                                              | 7.2(4.9)                                   | 8.6 (9.6)                | N/A                                                               |                      |
| Week 24                                               | 4.9 (3.6)                                  | 5.4 (3.3)                | -0.44 (-1.92, 1.04)                                               | 0.56                 |
| Week 52                                               | 4.1 (3.0)                                  | 6.3 (3.5)                | -2.22 (-3.79, -0.66)                                              | 0.005                |
| <b>Percentage of days abstinent, Lsmean (SD)</b>      |                                            |                          |                                                                   |                      |
| Baseline                                              | 35 (29)                                    | 33 (30)                  | N/A                                                               |                      |
| Week 24                                               | 70 (30)                                    | 59 (32)                  | 8% (-0.4%, 17%)                                                   | 0.06                 |
| Week 52                                               | 77 (29)                                    | 60(39)                   | 15% (1%, 30%)                                                     | 0.03                 |
| <b>PEth, Lsmean (SD)<sup>d</sup></b>                  |                                            |                          |                                                                   |                      |
| Baseline                                              | 144.5 (160.4)                              | 182.0 (222.9)            | NA                                                                |                      |
| Week 24                                               | 142.7 (177.6)                              | 241.5 (323.5)            | -43.29 (-170.62, 84.05)                                           | 0.50                 |
| <b>VACS Index, Lsmean (SD)<sup>e</sup></b>            |                                            |                          |                                                                   |                      |
| Baseline                                              | 28.9 (16.2)                                | 28.2 (21.3)              | NA                                                                |                      |
| Week 24                                               | 26.5 (14.5)                                | 29.9 (20.3)              | -1.84 (-5.25, 1.57)                                               | 0.28                 |
| Week 52                                               | 27.9 (16.1)                                | 27.4 (20.3)              | 0.83 (-5.84, 4.16)                                                | 0.74                 |
| <b>Undetectable HIV viral load, n (%)<sup>f</sup></b> |                                            |                          |                                                                   |                      |
| Baseline                                              | 42/63 (66.7)                               | 41/65 (63.1)             | NA                                                                |                      |
| Week 24                                               | 30/38 (78.9)                               | 24/36 (66.7)             | 1.99 (0.55, 7.24)                                                 | 0.98                 |
| Week 52                                               | 27/30 (90.0)                               | 23/35 (65.7)             | 5.58 (1.11, 27.99)                                                | 0.04                 |

a. Estimates based on results from linear mixed effects models for continuous outcomes and generalized linear mixed effects models for binary outcomes. For binary variables, treatment effects are expressed as an adjusted odds ratio.

b. Values adjusted for baseline assessment, site, baseline VACS Index

c. No heavy drinking defined as the absence of any heavy drinking days in the past 30 days, where heavy drinking days is defined for men  $\geq 5$  drinks per day and for women as  $\geq 4$  drinks per day.

d. PEth = phosphatidylethanol, an alcohol biomarker reflecting alcohol use over the past 21 days and higher scores are associated with higher levels of alcohol use.<sup>41</sup>

e. VACS Index is a validated measure of morbidity and mortality based on age, HIV biomarkers (CD4 cell count, HIV viral load), hemoglobin, FIB-4 score (a measure of liver fibrosis calculated based on aspartate and alanine aminotransferase and platelet count), creatinine and hepatitis C status. Scores range from 0 to 164; each 5 point increase is associated with a 20% increase in 5 year mortality risk.<sup>7,57</sup>

f. Undetectable HIV viral load was based on the limit of detection and defined as <50 copies per mL

**Supplementary Table 3. Past 6 month treatment services, emergency department visits and hospitalizations at baseline and follow-up by treatment group**

| Medication                                           | Integrated Stepped Alcohol Treatment, N=63 | Treatment as Usual, N=65 | p value |
|------------------------------------------------------|--------------------------------------------|--------------------------|---------|
| Any inpatient alcohol treatment, n (%) <sup>a</sup>  |                                            |                          |         |
| Baseline                                             | 1 (1.59)                                   | 1 (1.54)                 |         |
| Week 24                                              | 0 (0.00)                                   | 3 (4.62)                 | 0.24    |
| Week 52                                              | 1 (1.59)                                   | 3 (4.62)                 | 0.62    |
| Any outpatient alcohol treatment, n (%) <sup>a</sup> |                                            |                          |         |
| Baseline                                             | 1 (1.59)                                   | 1 (1.54)                 |         |
| Week 24                                              | 37 (58.73)                                 | 26 (40.00)               | 0.03    |
| Week 52                                              | 19 (30.16)                                 | 24 (36.92)               | 0.42    |
| Emergency Department Visits, n (%) <sup>b</sup>      |                                            |                          |         |
| Baseline                                             | 17 (26.98)                                 | 20 (30.77)               |         |
| Week 24                                              | 19 (30.16)                                 | 22 (33.85)               | 0.65    |
| Week 52                                              | 20 (31.75)                                 | 16 (24.62)               | 0.37    |
| Hospitalization, n (%) <sup>b</sup>                  |                                            |                          |         |
| Baseline                                             | 9 (14.29)                                  | 9 (13.85)                |         |
| Week 24                                              | 5 (7.94)                                   | 12 (18.46)               | 0.08    |
| Week 52                                              | 12 (19.05)                                 | 6 (9.23)                 | 0.11    |

- a. Assessed using electronic medical record data and based on presence of an alcohol or drug related ICD-9 or ICD-10 code at any time and, for outpatient services, if they had a SUD clinic stop code or CPT code; for inpatient services, included if they had a SUD bed section stop code or ICD-9 or ICD-10 procedure code.<sup>1</sup>
- b. Assessed using electronic medical record data.
